# Supplementary material for: First molecular phylogenetic insights into the evolution of Eriocaulon (Eriocaulaceae, Poales)
Source: PubMed Central journal article supplement (PMC6713687; doi:10.1007/s10265-019-01129-3), 2019-08-05
Supplement: 10265_2019_1129_MOESM1_ESM.pdf [file 10265_2019_1129_MOESM1_ESM.pdf]

## **Electronic supplementary materials**

### **Title:**

First molecular phylogenetic insights into the evolution of *Eriocaulon* (Eriocaulaceae, Poales)

### **Authors:**

Isabel Larridon · Norio Tanaka · Yuxi Liang · Sylvia M. Phillips · Anders S. Barfod · Seong-Hyun Cho ·  
Stephan W. Gale · Richard W. Jobson · Young-Dong Kim · Jie Li · A. Muthama Muasya · John A.N.  
Parnell · Amornrat Prajaksood · Kohtaroh Shutoh · Phetlasy Souladeth · Shuichiro Tagane · Nobuyuki  
Tanaka · Okihito Yano · Attila Mesterházy · Mark F. Newman · Yu Ito

### **Journal:**

Journal of Plant Research

### **Corresponding author:**

Isabel Larridon (B.A. Krukoff Curator of African Botany)  
Royal Botanic Gardens, Kew, Richmond, Surrey, TW9 3AE, United Kingdom  
Phone: +44 (0)20 8332 5271  
Fax: n.a.  
Email: [i.larridon@kew.org](mailto:i.larridon@kew.org)

### **Content:**

**Tables S1–S2**

**Table S1.** Overview of infrageneric classifications of *Eriocaulon*. Currently accepted names (WCSP 2019) are provided in parentheses. Taxa sampled in the molecular phylogenetic study are indicated with an asterisk (\*) next to the name used in the phylogenetic tree.

| Mueller (1859)                                                 | Fyson (1919, 1921, 1922)                                                                               | Ma (1991, 1997)                                                                               | Ansari and Balakrishnan (1994, 2009)                                | Zhang (1999)                                                                                           |
|----------------------------------------------------------------|--------------------------------------------------------------------------------------------------------|-----------------------------------------------------------------------------------------------|---------------------------------------------------------------------|--------------------------------------------------------------------------------------------------------|
| <b>Sect. <i>Eriocaulon</i></b>                                 | <b>Sect. <i>Setaceae</i> Fyson</b>                                                                     | <b>Subgen. <i>Trimeranthus</i> Nakai</b>                                                      | <b>Sect. I</b>                                                      | <b>Subgen. <i>Trimeranthus</i> Nakai</b>                                                               |
| <i>E. ciliiflorum</i> F.Muell.<br>( <i>E. cinereum</i> R.Br.*) | <i>E. intermedium</i> Körn. ( <i>E. setaceum</i> L.*)                                                  | <b>Sect. <i>Macrocaulon</i> Ruhland</b>                                                       | <i>E. alpestre</i> Hook.f. & Thomson ex Körn.*                      | <b>Sect. <i>Macrocaulon</i> Ruhland</b>                                                                |
| <i>E. concretum</i> F.Muell.                                   | <i>E. setaceum</i> L.*                                                                                 | <b>Ser. <i>Tmetopsis</i> Ruhland</b>                                                          | <b>Sect. II</b>                                                     | <i>E. setaceum</i> L.*                                                                                 |
| <i>E. lividum</i> F.Muell.                                     | <b>Sect. <i>Simplices</i> Fyson</b>                                                                    | <i>E. acutibracteatum</i> W.L.Ma                                                              | <i>E. helferi</i> Hook.f.                                           | <b>Sect. <i>Simplices</i> Fyson</b>                                                                    |
| <i>E. monoscapum</i> F.Muell.                                  | <i>E. achiton</i> Körn.                                                                                | <i>E. angustulum</i> W.L.Ma ( <i>E. nantoense</i> Hayata*)                                    | <i>E. rhodae</i> Fyson ( <i>E. robustobrownianum</i> Ruhland)       | <i>E. achiton</i> Körn.                                                                                |
| <i>E. spectabile</i> F.Muell.                                  | <i>E. barba-caprae</i> Fyson                                                                           | <i>E. australe</i> R.Br.*                                                                     | <b>Sect. III</b>                                                    | <i>E. boni</i> Lecomte                                                                                 |
| <i>E. tortuosum</i> F.Muell.                                   | <i>E. collettii</i> Hook.f.                                                                            | <i>E. brownianum</i> Mart.                                                                    | <i>E. ansarii</i> Pradeep & Sunil                                   | <i>E. brownianum</i> Mart.                                                                             |
| <b>Sect. <i>Dimorphogyne</i> F.Muell.</b>                      | <i>E. diana</i> Fyson ( <i>E. heterolepis</i> Steud.)                                                  | <i>E. henryanum</i> Ruhland*                                                                  | <i>E. balakrishnani</i> Puneekar, Lakshmin. & Vasudeva Rao          | <i>E. collinum</i> Hook.f. ( <i>E. odoratum</i> Dalzell*)                                              |
| <i>E. heterogynum</i> F.Muell.                                 | <i>E. duthiei</i> Hook.f.                                                                              | <i>E. nantoense</i> Hayata*                                                                   | <i>E. brownianum</i> Mart.                                          | <i>E. ermeiense</i> W.L.Ma ex Z.X.Zhang                                                                |
|                                                                | <i>E. geoffreyi</i> Fyson ( <i>E. pectinatum</i> Ruhland)                                              | <i>E. pullum</i> T.Koyama ( <i>E. nepalense</i> J.D.Prescott ex Bong* var. <i>nepalense</i> ) | <i>E. devendranii</i> Vijaya Sankar, K.Ravik. & Ganesh Babu         | <i>E. eglandulatum</i> Z.X.Zhang ( <i>E. infirmum</i> Steud.* var. <i>infirmum</i> )                   |
|                                                                | <i>E. gregatum</i> Körn.                                                                               | <i>E. rockianum</i> Hand.-Mazz.                                                               | <i>E. ensiforme</i> C.E.C.Fisch.                                    | <i>E. heterolepis</i> Steud.                                                                           |
|                                                                | <i>E. luzulifolium</i> Mart.* ( <i>E. nepalense</i> var. <i>luzulifolium</i> (Mart.) Praj. & J.Parn.*) | <b><i>E. schochianum</i> Hand.-Mazz.</b>                                                      | <i>E. heterolepis</i> Steud.                                        | <i>E. kunmingense</i> Z.X.Zhang                                                                        |
|                                                                | <i>E. nepalense</i> J.D.Prescott ex Bong.*                                                             | <i>E. senile</i> Honda ( <i>E. nepalense</i> J.D.Prescott ex Bong* var. <i>nepalense</i> )    | <i>E. hookerianum</i> Stapf                                         | <i>E. laosense</i> Moldenke*                                                                           |
|                                                                | <i>E. pumilio</i> Hook.f. ( <i>E. nepalense</i> var. <i>luzulifolium</i> (Mart.) Praj. & J.Parn.*)     | <i>E. setaceum</i> L.*                                                                        | <i>E. karnatakense</i> S.P.Gaikwad, Sardesai, U.S.Yadav & S.R.Yadav | <i>E. leianthum</i> W.L.Ma                                                                             |
|                                                                | <i>E. quinquangulare</i> L.                                                                            | <i>E. sexangulare</i> L.*                                                                     | <i>E. kolhapurensis</i> S.P.Gaikwad, Sardesai & S.R.Yadav           | <i>E. luzulifolium</i> Mart.* ( <i>E. nepalense</i> var. <i>luzulifolium</i> (Mart.) Praj. & J.Parn.*) |

|                                                                     |                                                                                    |                                                                     |                                                                                                           |
|---------------------------------------------------------------------|------------------------------------------------------------------------------------|---------------------------------------------------------------------|-----------------------------------------------------------------------------------------------------------|
| <i>E. roseum</i> Fyson                                              | <i>E. sollyanum</i> Royle                                                          | <i>E. lanceolatum</i> Miq. ex Steud.                                | <i>E. nantoense</i> Hayata*                                                                               |
| <i>E. sedgwickii</i> Fyson                                          | <i>E. yaoshanense</i> Ruhland ( <i>E. fluviatile</i> Trimen*)                      | <i>E. nepalense</i> J.D.Prescott ex Bong.*                          | <i>E. nepalense</i> J.D.Prescott ex Bong.*                                                                |
| <i>E. thwaitesii</i> Körn.                                          | <b>Ser. <i>Leiantha</i> W.L.Ma</b>                                                 | <i>E. odoratum</i> Dalzell*                                         | <i>E. oryzetorum</i> Mart.                                                                                |
| <i>E. trilobum</i> Buch.-Ham. Ex Körn. ( <i>E. sollyanum</i> Royle) | <i>E. bilobatum</i> W.L.Ma ( <i>E. kunmingense</i> Z.X.Zhang)                      | <i>E. oryzetorum</i> Mart.                                          | <i>E. parvum</i> Körn.*                                                                                   |
| <i>E. trimenii</i> Hook.f.                                          | <i>E. leianthum</i> W.L.Ma                                                         | <i>E. parviflorum</i> (Fyson) R.Ansari & N.P.Balacr.*               | <i>E. pseudonepalense</i> Satake ( <i>E. nepalense</i> var. <i>luzulifolium</i> (Mart.) Praj. & J.Parn.*) |
| <i>E. truncatum</i> Buch.-Ham. ex Mart.*                            | <i>E. zollingerianum</i> Körn.*                                                    | <i>E. richardianum</i> (Fyson) R.Ansari & N.P.Balacr.               | <i>E. quinqueangulare</i> L.                                                                              |
| <i>E. xeranthemum</i> Mart.*                                        | <b>Ser. <i>Disepala</i> Satake</b>                                                 | <i>E. robustobrownianum</i> Ruhland                                 | <i>E. robustobrownianum</i> Ruhland                                                                       |
| <b>Sect. <i>Hirsutae</i> Fyson</b>                                  | <i>E. merrillii</i> Ruhland ex Perkins ( <i>E. truncatum</i> Buch.-Ham. Ex Mart.*) | <i>E. santapau</i> Moldenke                                         | <i>E. rockianum</i> Hand.-Mazz.                                                                           |
| <i>E. brownianum</i> Mart.                                          | <i>E. sclerophyllum</i> W.L.Ma                                                     | <i>E. sharmae</i> R.Ansari & N.P.Balacr.                            | <i>E. schochianum</i> Hand.-Mazz.                                                                         |
| <i>E. gracile</i> Mart.                                             | <b>Sect. <i>Leucocephala</i> Nakai</b>                                             | <i>E. sivarajanii</i> R.Ansari & N.P.Balacr.                        | <i>E. smitinandii</i> Moldenke                                                                            |
| <i>E. lanceolatum</i> Miq. Ex Steud.                                | <i>E. cinereum</i> R.Br.*                                                          | <i>E. stellulatum</i> Körn.                                         | <i>E. sollyanum</i> Royle                                                                                 |
| <i>E. rhodae</i> Fyson                                              | <i>E. echinulatum</i> Mart.*                                                       | <i>E. trilobum</i> Buch.-Ham. Ex Körn. ( <i>E. sollyanum</i> Royle) | <i>E. thailandicum</i> Moldenke*                                                                          |
| <i>E. robusto-brownianum</i> Ruhland                                | <i>E. taishanense</i> F.Z.Li                                                       | <i>E. thwaitesii</i> Körn.                                          | <i>E. wightianum</i> Mart.*                                                                               |
| <i>E. wightianum</i> Mart.*                                         | <b>Sect. <i>Spathopeplus</i> Nakai</b>                                             | <i>E. vasudevanii</i> R.Ansari & N.P.Balacr.                        | <i>E. xenopodion</i> T.Koyama                                                                             |
| <b>Sect. <i>Anisopetalae</i> Fyson</b>                              | <b>Ser. <i>Miqueliana</i> Satake</b>                                               | <i>E. xeranthemum</i> Mart.*                                        | <i>E. xeranthemum</i> Mart.*                                                                              |
| <i>E. atratum</i> Körn.                                             | <i>E. buergerianum</i> Körn.*                                                      | <b>Sect. IV</b>                                                     | <b>Sect. <i>Anisopetalae</i> Fyson</b>                                                                    |
| <i>E. ceylanicum</i> Körn.                                          | <i>E. sikokianum</i> Maxim.* ( <i>E. miquelianum</i> Körn.*)                       | <i>E. capillus-naiadis</i> Hook.f. ( <i>E. setaceum</i> L.)         | <i>E. bassacense</i> Moldenke                                                                             |
| <i>E. cristatum</i> Mart.*                                          | <b>Ser. <i>Robustiora</i> W.L.Ma</b>                                               | <b><i>E. setaceum</i> L.</b>                                        | <i>E. cristatum</i> Mart.*                                                                                |
| <i>E. longicuspis</i> Hook.f.                                       | <i>E. alpestre</i> Hook.f. & Thomson ex Körn.*                                     | <b>Sect. V</b>                                                      | <i>E. eberhardtii</i> Lecomte                                                                             |

|                                                |                                                                                      |                                                                          |                                                                                       |
|------------------------------------------------|--------------------------------------------------------------------------------------|--------------------------------------------------------------------------|---------------------------------------------------------------------------------------|
| <i>E. odoratum</i> Dalzell*                    | <i>E. chinorossicum</i> Kom.                                                         | <i>E. longifolium</i> Nees ex Kunth ( <i>E. willdenovianum</i> Moldenke) | <i>E. henryanum</i> Ruhland*                                                          |
| <i>E. robustum</i> Steud.                      | <i>E. glabripetalum</i> W.L.Ma                                                       | <i>E. peninsulare</i> Punekar & Lakshmin.                                | <i>E. hookerianum</i> Stapf                                                           |
| <b>Sect. Scariosae</b> Fyson                   | <i>E. minusculum</i> Moldenke                                                        | <i>E. sexangulare</i> L.*                                                | <i>E. kradungense</i> * Satake ( <i>E. ubonense</i> Lecomte* subsp. <i>ubonense</i> ) |
| <i>E. edwardii</i> Fyson                       | <i>E. robustium</i> (Maxim.) Makino ( <i>E. alpestre</i> Hook.f. & Thomson ex Körn.) | <b>Sect. VI</b>                                                          | <i>E. nautiliforme</i> Lecomte*                                                       |
| <i>E. hamiltonianum</i> Mart.*                 | <b>Ser. Manshanensia</b> W.L.Ma                                                      | <i>E. achiton</i> Körn.                                                  | <i>E. siamense</i> Lecomte*                                                           |
| <i>E. oryzetorum</i> Mart.                     | <i>E. faberi</i> Ruhland                                                             | <i>E. anshiense</i> Punekar, Malpure & Lakshmin.                         | <i>E. tanakae</i> Ruhland                                                             |
| <b>Sect. Cristato-sepalae</b> Fyson            | <i>E. mangshanense</i> W.L.Ma                                                        | <i>E. cuspidatum</i> Dalzell*                                            | <b>Sect. Heterochiton</b> Ruhland                                                     |
| <i>E. cuspidatum</i> Dalz.*                    | <b>Subgen. Eriocaulon</b>                                                            | <i>E. duthiei</i> Hook.f.                                                | <i>E. australe</i> R.Br.*                                                             |
| <i>E. echinulatum</i> Mart.*                   | <i>E. decemflorum</i> Maxim.*                                                        | <i>E. eurypeplon</i> Körn.                                               | <i>E. sexangulare</i> L.*                                                             |
| <i>E. elenorae</i> Fyson                       |                                                                                      | <i>E. fysonii</i> R.Ansari & N.P.Balacr.                                 | <i>E. willdenovianum</i> Moldenke                                                     |
| <i>E. margaretae</i> Fyson                     |                                                                                      | <i>E. koynense</i> Punekar, Mungikar & Lakshmin.                         | <b>Sect. Disepala</b> (Satake) Z.X.Zhang                                              |
| <i>E. minutum</i> Hook.f.                      |                                                                                      | <i>E. sedgwickii</i> Fyson                                               | <i>E. dipsacoides</i> Satake ( <i>E. escape</i> B.F.Hansen)                           |
| <i>E. sexangulare</i> L.*                      |                                                                                      | <b>Sect. VII</b>                                                         | <i>E. echinulatum</i> Mart.*                                                          |
| <i>E. stellulatum</i> Körn.                    |                                                                                      | <i>E. cherrapunjanum</i> R.Ansari & N.P.Balacr.                          | <i>E. hamiltonianum</i> Mart.*                                                        |
| <i>E. thomasi</i> Fyson                        |                                                                                      | <i>E. conicum</i> (Fyson) C.E.C.Fisch.                                   | <i>E. nigrum</i> Lecomte                                                              |
| <b>Sect. Connato-sepalae</b> Fyson             |                                                                                      | <i>E. cristatum</i> Mart.*                                               | <i>E. pseudotruncatum</i> Z.X.Zhang                                                   |
| <i>E. alpestre</i> Hook.f. & Thomson ex Körn.* |                                                                                      | <i>E. edwardii</i> Fyson                                                 | <i>E. thwaitesii</i> Körn.                                                            |
| <b>Sect. Leucantherae</b> Fyson                |                                                                                      | <i>E. hamiltonianum</i> Mart.*                                           | <i>E. truncatum</i> Buch.-Ham. Ex Mart.*                                              |
| <i>E. breviscapum</i> Körn.*                   |                                                                                      | <i>E. longicuspe</i> Hook.f.                                             | <i>E. zollingerianoides</i>                                                           |

|                                                                                            |                                                                                                       |                                                                                                             |
|--------------------------------------------------------------------------------------------|-------------------------------------------------------------------------------------------------------|-------------------------------------------------------------------------------------------------------------|
| <i>E. fluviatile</i> Trimen*                                                               | <i>E. martianum</i> Wall. ex Körn.<br>( <i>E. quinquangulare</i> L. subsp.<br><i>quinquangulare</i> ) | Z.X.Zhang ( <i>E. hamiltonianum</i><br>Mart. var. <i>hamiltonianum</i> )                                    |
| <i>E. horsley-kondae</i> Fyson                                                             | <i>E. palghatense</i> R.Ansari &<br>N.P.Balacr.                                                       | <i>E. zollingerianum</i> Körn.*                                                                             |
| <i>E. miserum</i> Körn.                                                                    | <i>E. quinquangulare</i> L.                                                                           | <b>Sect. Leucantherae Fyson</b>                                                                             |
| <i>E. rivulare</i> Dalzell                                                                 | <i>E. raipureense</i> K.K.Khanna<br>& Mudgal & An.Kumar                                               | <i>E. barbeyanum</i> Ruhland ( <i>E.</i><br><i>fluviatile</i> Trimen*)                                      |
| <i>E. sieboldianum</i> Siebold<br>& Zucc. ex Steud. ( <i>E.</i><br><i>cinereum</i> R.Br.*) | <i>E. ramnadense</i> R.Ansari &<br>N.P.Balacr.                                                        | <i>E. cinereum</i> R.Br.*                                                                                   |
|                                                                                            | <i>E. truncatum</i> Buch.-Ham. ex<br>Mart.*                                                           | <i>E. taishanense</i> F.Z.Li                                                                                |
|                                                                                            | <b>Sect. VIII</b>                                                                                     | <i>E. tonkinense</i> Ruhland* ( <i>E.</i><br><i>fluviatile</i> Trimen*)                                     |
|                                                                                            | <i>E. collettii</i> Hook.f.                                                                           | <b>Sect. Nasmythia Huds.</b>                                                                                |
|                                                                                            | <i>E. nairii</i> Chandrab. &<br>V.Chandras.                                                           | <i>E. decemflorum</i> Maxim.*                                                                               |
|                                                                                            | <i>E. robustum</i> Steud.                                                                             | <b>Subgen. Spathoepplus Körn.</b>                                                                           |
|                                                                                            | <b>Sect. IX</b>                                                                                       | <b>Sect. Apoda (Satake)</b><br><b>Z.X.Zhang</b>                                                             |
|                                                                                            | <i>E. elenorae</i> Fyson                                                                              | <i>E. alpestre</i> Hook.f. &<br><b>Thomson ex Körn.</b>                                                     |
|                                                                                            | <i>E. margaretae</i> Fyson                                                                            | <i>E. atriodes</i> Satake ( <i>E.</i><br><i>miquelianum</i> Körn.*)                                         |
|                                                                                            | <i>E. meeboldii</i> R.Ansari &<br>N.P.Balacr.                                                         | <i>E. atrum</i> Nakai                                                                                       |
|                                                                                            | <i>E. minutum</i> Hook.f.                                                                             | <i>E. buergerianum</i> Körn.*                                                                               |
|                                                                                            | <b>Sect. X</b>                                                                                        | <i>E. faberi</i> Ruhland                                                                                    |
|                                                                                            | <i>E. apetalum</i> Punekar,<br>Malpure & Lakshmin.                                                    | <i>E. hondoense</i> Satake* ( <i>E.</i><br><i>taquetii</i> Lecomte*)                                        |
|                                                                                            | <i>E. kanarense</i> Punekar,<br>Watve & Lakshmin.                                                     | <i>E. japonicum</i> Körn.                                                                                   |
|                                                                                            |                                                                                                       | <i>E. kusiroense</i> Miyabe &<br>Kudô ex Satake ( <i>E.</i><br><i>sachalinense</i> var. <i>kusiroense</i> ) |

- (Miyabe & Kudô ex Satake)  
T.Koyama ex Miyam.)
- E. maharashtrense* Punekar  
& Lakshmin.
- E. pectinatum* Ruhland
- E. rajendrababui* R.Ansari  
& N.P.Balacr.
- E. sahyadricum* Punekar,  
Malpure & Lakshmin. (*E.*  
*stellulatum* Körn.)
- Sect. XI**
- E. tuberiferum* A.R.Kulk. &  
Desai
- Sect. XII**
- E. barbeyanum* Ruhland (*E.*  
*fluviatile* Trimen\*)
- E. breviscapum* Körn.\*
- E. cinereum* R.Br.\*
- E. cookei* Punekar, Malpure  
& Lakshmin.
- E. dalzellii* Körn.
- E. fluviatile* Trimen\*
- E. leucomelas* Steud.
- E. miserum* Körn.
- E. mitophyllum* Hook.f. (*E.*  
*fluviatile* Trimen\*)
- E. panagudianum* R.Ansari  
& N.P.Balacr.
- E. ratnagiricus* S.R.Yadav,  
S.P.Gaikwad & Sardesai
- E. liberisepalum* Z.X.Zhang
- E. minusculum* Moldenke
- E. miquelianum* Körn.**
- E. monococcon* Nakai
- E. nanellum* Ohwi (*E. takae*  
Koidz.)
- E. sachalinense* Miyabe &  
Nakai
- E. sekimotoi* Honda (*E.*  
*taquetii* Lecomte\*)
- E. sphagnicola* Ohwi (*E.*  
*sachalinense* var. *kusiroense*  
(Miyabe & Kudô ex Satake)  
T.Koyama ex Miyam.)
- E. takae* Koidz.
- E. tenuissimum* Nakai (*E.*  
*miquelianum* Körn.)
- E. zytanii* Satake
- Sect. Macropoda (Satake)**  
**Z.X.Zhang**
- E. heleocharioides* Satake\*
- Sect. Nudicuspa Z.X.Zhang**
- E. nudicuspe* Maxim.

*E. redactum* Ruhland  
*E. ritchieanum* Ruhland  
*E. talbotii* R. Ansari &  
N.P. Balakr.

---

**Table S2.** Specimen and voucher information for *Eriocaulon* and its outgroup taxa included in this study. Sequences generated in the present study are underlined. Herbarium acronyms are in accordance with Index Herbariorum (<http://sciweb.nybg.org/science2/IndexHerbariorum.asp>).

| Taxon                                                                     | Voucher information                                                | Locality           | Lab ID | <i>matK</i>     | <i>rbcL</i>     | <i>rpoB</i>     | <i>rpoC1</i>    | <i>PHYC</i>     |
|---------------------------------------------------------------------------|--------------------------------------------------------------------|--------------------|--------|-----------------|-----------------|-----------------|-----------------|-----------------|
| OUTGROUP                                                                  |                                                                    |                    |        |                 |                 |                 |                 |                 |
| <i>Xyris</i> Gronov. ex L. sp.                                            | Chase, M.W. s.n. (NCU)                                             | n/a                |        | -               | -               | -               | -               | KP083152        |
| <i>Syngonanthus angolensis</i><br>H.E.Hess                                | Goyder, D.J. 8359 (K)                                              | Angola             | TD5169 | <u>LC461615</u> | <u>LC461623</u> | <u>LC461636</u> | <u>LC461644</u> | <u>LC461650</u> |
| <i>Syngonanthus chrysanthus</i><br>(Bong.) Ruhland (ID unsure<br>GenBank) | Ames, M. 10/15/2009                                                | n/a                |        | -               | -               | HQ18289<br>7    | -               | -               |
| <i>Syngonanthus flavidulus</i><br>(Michx.) Ruhland                        | Abbott 22378 (FLAS)                                                | n/a                |        | KJ773197        | -               | -               | -               | -               |
| <i>Syngonanthus peruvianus</i><br>Ruhland                                 | Jorgensen, P. M., Luteyn, J.<br>L. & Romoleroux, K.<br>92740 (AAU) | Ecuador            | TD5212 | <u>LC461616</u> | <u>LC461624</u> | <u>LC461637</u> | <u>LC461645</u> | -               |
| <i>Paepalanthus muscosus</i> Körn.                                        | Laegaard, S. 54916 (AAU)                                           | Ecuador            | TD5207 | <u>LC461627</u> | -               | <u>LC461639</u> | -               | -               |
| <i>Paepalanthus obnatus</i> Tissot-<br>Sq.                                | Madsen, J. E. 7154 (AAU)                                           | Ecuador            | TD5218 | <u>LC461618</u> | <u>LC461626</u> | <u>LC461638</u> | -               | -               |
| <i>Paepalanthus pilosus</i> (Kunth)<br>Kunth                              | Laegaard, S. 53217 (AAU)                                           | Ecuador            | TD5198 | <u>LC461619</u> | <u>LC461628</u> | -               | -               | -               |
| <i>Tonina fluviatilis</i> Aubl. (ID<br>unsure GenBank)                    | n/a                                                                | n/a                |        | -               | AY123237        | -               | -               | -               |
| <i>Mesanthemum albidum</i><br>Lecomte                                     | Molmou, D. 919 (K)                                                 | Guinea-<br>Conakry | TD5094 | -               | <u>LC461630</u> | -               | -               | -               |
| <i>Mesanthemum glabrum</i> Kimp.                                          | Goyder, D.J. 8358 (K)                                              | Angola             | TD5174 | -               | <u>LC461635</u> | <u>LC461643</u> | <u>LC461649</u> | <u>LC461653</u> |
| <i>Mesanthemum prescottianum</i><br>(Bong.) Körn.                         | Couch, C.A. 754 (K)                                                | Guinea-<br>Conakry | TD5095 | <u>LC461620</u> | <u>LC461632</u> | <u>LC461641</u> | <u>LC461647</u> | <u>LC461651</u> |
| <i>Mesanthemum radicans</i><br>(Benth.) Körn.                             | van der Burgt, X.M. 1732<br>(K:001061936)                          | Sierra<br>Leone    | TD5059 | <u>LC461621</u> | <u>LC461633</u> | <u>LC461642</u> | <u>LC461648</u> | <u>LC461652</u> |
| INGROUP                                                                   |                                                                    |                    |        |                 |                 |                 |                 |                 |
| <i>E. afzelianum</i> Wikstr. ex Körn.                                     | Fofana, F. 233<br>(K:000749971)                                    | Guinea-<br>Conakry | TD5064 | -               | <u>LC485810</u> | -               | -               | -               |
| <i>E. asteroides</i> S.M.Phillips                                         | Pollard, B.J. 700<br>(K:000746173)                                 | Cameroon           | TD5105 | -               | <u>LC485811</u> | -               | -               | -               |
| <i>E. australe</i> R.Br.                                                  | Cho et al. CB-0568 (HHU)                                           | Cambodia           | CB0568 | <u>LC485678</u> | <u>LC485812</u> | <u>LC486730</u> | <u>LC484925</u> | -               |



|                                                 |                                                     |                 |        |                          |                          |                          |                          |                          |
|-------------------------------------------------|-----------------------------------------------------|-----------------|--------|--------------------------|--------------------------|--------------------------|--------------------------|--------------------------|
| <i>E. australe</i> R.Br.                        | Cho et al. CB-0767 (HHU)                            | Cambodia        | CB0767 | <a href="#">LC485679</a> | <a href="#">LC485813</a> | <a href="#">LC486731</a> | <a href="#">LC484926</a> | -                        |
| <i>E. australe</i> R.Br.                        | Ito, Y. YI2344 (TNS)                                | Australia       | YI2344 | <a href="#">LC485761</a> | <a href="#">LC485926</a> | <a href="#">LC485617</a> | <a href="#">LC484949</a> | <a href="#">LC484480</a> |
| <i>E. sexangulare</i> L.                        | Tanaka, N. s.n. (TNS)                               | Singapore       | TD5253 | <a href="#">LC485680</a> | <a href="#">LC485814</a> | <a href="#">LC486732</a> | <a href="#">LC484927</a> | <a href="#">LC484447</a> |
| <i>E. sexangulare</i> L.                        | Ito, Y. YI2299 (TNS)                                | Malaysia        | YI2299 | <a href="#">LC485681</a> | <a href="#">LC485815</a> | <a href="#">LC486733</a> | <a href="#">LC484928</a> | <a href="#">LC484448</a> |
| <i>E. wightianum</i> Mart.                      | Toyama, H. et al. 2516 (TNS)                        | Cambodia        | TD4995 | <a href="#">LC485682</a> | <a href="#">LC485816</a> | <a href="#">LC486734</a> | <a href="#">LC484929</a> | -                        |
| <i>E. bongense</i> Engl. & Ruhland              | MABEN202 (BP)                                       | Benin           | TD5437 | <a href="#">LC485683</a> | <a href="#">LC485817</a> | -                        | -                        | -                        |
| <i>E. breviscapum</i> Körn.                     | Tagane, S. et al. 4317 (TNS)                        | Cambodia        | TD4998 | -                        | -                        | <a href="#">LC486735</a> | <a href="#">LC484930</a> | -                        |
| <i>E. sp. 08</i>                                | Won et al. HW-9169 (HHU)                            | Cambodia        | HW9169 | <a href="#">LC485684</a> | <a href="#">LC485818</a> | -                        | -                        | <a href="#">LC484449</a> |
| <i>E. sp. Cambodia</i>                          | Toyama, H. et al. 1759 (TNS)                        | Cambodia        | TD4994 | -                        | <a href="#">LC485819</a> | <a href="#">LC486736</a> | -                        | -                        |
| <i>E. carsonii</i> F.Muell.                     | Ito, Y. YI2309 (TNS)                                | Australia       | YI2309 | <a href="#">LC485685</a> | <a href="#">LC485820</a> | -                        | -                        | -                        |
| <i>E. carsonii</i> F.Muell.                     | Ito, Y. YI2312 (TNS)                                | Australia       | YI2312 | <a href="#">LC485686</a> | <a href="#">LC485821</a> | <a href="#">LC485330</a> | <a href="#">LC484931</a> | <a href="#">LC484450</a> |
| <i>E. carsonii</i> F.Muell.                     | Ito, Y. YI2324 (TNS)                                | Australia       | YI2324 | <a href="#">LC485687</a> | <a href="#">LC485822</a> | <a href="#">LC485331</a> | -                        | <a href="#">LC484451</a> |
| <i>E. cinereum</i> R.Br.                        | Porembski, S. 2999 (K)                              | Ivory Coast     | TD5068 | <a href="#">LC485688</a> | <a href="#">LC485823</a> | -                        | -                        | -                        |
| <i>E. cinereum</i> R.Br.                        | van der Burgt, X.M. 1357 (K:000023442)              | Sierra Leone    | TD5069 | <a href="#">LC485689</a> | <a href="#">LC485824</a> | <a href="#">LC485332</a> | -                        | -                        |
| <i>E. cinereum</i> R.Br.                        | Mesterhàzy, A. MAGUI215 (BP)                        | Guinea Conakry  | TD5442 | -                        | <a href="#">LC485825</a> | -                        | -                        | <a href="#">LC484452</a> |
| <i>E. sp. Burkina Faso</i>                      | Laegaard, S., Mipro Hien and H. Sangaré 21226 (AAU) | Burkina Faso    | TD5187 | -                        | <a href="#">LC485826</a> | -                        | -                        | -                        |
| <i>E. cinereum</i> R.Br.                        | Enju, C. CED076 (TNS)                               | Japan: Aichi    | CED076 | <a href="#">LC485690</a> | <a href="#">LC485827</a> | -                        | -                        | <a href="#">LC484453</a> |
| <i>E. cinereum</i> R.Br.                        | H. Fukuhara FOK-078924 (TNS:01141509)               | Japan           | TD5036 | <a href="#">LC485691</a> | <a href="#">LC485828</a> | <a href="#">LC485333</a> | -                        | -                        |
| <i>E. cinereum</i> R.Br.                        | Kato, S. YI1120 (TNS)                               | Japan: Nagasaki | YI1120 | -                        | <a href="#">LC485829</a> | -                        | -                        | -                        |
| <i>E. sp. Australia (cf. E. cinereum</i> R.Br.) | Ito, Y. YI2311 (TNS)                                | Australia       | YI2311 | <a href="#">LC485692</a> | <a href="#">LC485830</a> | <a href="#">LC485334</a> | -                        | <a href="#">LC484454</a> |
| <i>E. sp. Japan (cf. E. cinereum</i> R.Br.)     | Enju, C. CED092 (TNS)                               | Japan: Kanagawa | CED092 | <a href="#">LC485693</a> | <a href="#">LC485831</a> | -                        | -                        | -                        |
| <i>E. sp. Myanmar (cf. E.</i>                   | Tanaka, N. MY1884 (TNS)                             | Myanmar         | NT102  | <a href="#">LC485694</a> | <a href="#">LC485832</a> | <a href="#">LC485335</a> | <a href="#">LC484932</a> | <a href="#">LC484455</a> |

|                                                           |                                      |              |         |                 |                 |                 |                 |                 |  |
|-----------------------------------------------------------|--------------------------------------|--------------|---------|-----------------|-----------------|-----------------|-----------------|-----------------|--|
| <i>cinereum</i> R.Br.)                                    |                                      |              |         |                 |                 |                 |                 |                 |  |
| <i>E. sp.</i> Myanmar (cf. <i>E. cinereum</i> R.Br.)      | Tanaka, N. MY1875 (TNS)              | Myanmar      | NT93    | <u>LC485695</u> | <u>LC485833</u> | <u>LC485336</u> | <u>LC484933</u> | <u>LC484456</u> |  |
| <i>E. parviflorum</i> (Fyson)                             | Ito, Y. YI1194 (TNS)                 | India        | YI1194  | -               | -               | <u>LC485559</u> | <u>LC484934</u> | -               |  |
| R.Ansari & N.P.Balacr.                                    |                                      |              |         |                 |                 |                 |                 |                 |  |
| <i>E. cuspidatum</i> Dalzell                              | Ito, Y. YI1202 (TNS)                 | India        | YI1202  | -               | -               | <u>LC485560</u> | -               | -               |  |
| <i>E. sp.</i> 06                                          | Cho et al. CB-0768 (HHU)             | Cambodia     | CB0768  | <u>LC485696</u> | <u>LC485834</u> | <u>LC485561</u> | -               | -               |  |
| <i>E. compressum</i> Lam.                                 | Abbott 18806 (FLAS)                  | U.S.A.       |         | KJ772760        | KJ773484        | -               | -               | -               |  |
| <i>E. decangulare</i> L.                                  | Abbott 22496 (FLAS)                  | U.S.A.       |         | KJ772761        | KJ773485        | -               | -               | -               |  |
| <i>E. decemflorum</i> Maxim.                              | Mitsuda et al. 94178 (TNS:722501)    | Japan        | TD5013  | -               | <u>LC485835</u> | -               | -               | -               |  |
| <i>E. dregei</i> Hochst.                                  | Gotze, AR 121 (PRE)                  | South Africa | TD5300  | <u>LC485697</u> | <u>LC485836</u> | <u>LC485562</u> | -               | -               |  |
| <i>E. echinulatum</i> Mart.                               | Cho et al. CB-0592 (HHU)             | Cambodia     | CB0592  | <u>LC485698</u> | <u>LC485837</u> | <u>LC485563</u> | -               | -               |  |
| <i>E. echinulatum</i> Mart.                               | Souladeth, P. PS365 (FOF)            | Laos         | PS365   | <u>LC485699</u> | <u>LC485838</u> | <u>LC485564</u> | -               | -               |  |
| <i>E. echinulatum</i> Mart.                               | Souladeth, P. PS447 (FOF)            | Laos         | PS447   | <u>LC485700</u> | <u>LC485839</u> | <u>LC485565</u> | <u>LC484935</u> | <u>LC484457</u> |  |
| <i>E. fluviatile</i> Trimen                               | Gale, S.W. et al. HNL-KFBG 934 (HNL) | Laos         | HNL0934 | <u>LC485701</u> | <u>LC485840</u> | <u>LC485566</u> | <u>LC484936</u> | <u>LC484458</u> |  |
| <i>E. fluviatile</i> Trimen                               | Souladeth, P. PS378 (FOF)            | Laos         | PS378   | <u>LC485702</u> | <u>LC485841</u> | <u>LC485567</u> | -               | -               |  |
| <i>E. sp.</i> 10                                          | Won et al. HW-8707 (HHU)             | Cambodia     | HW8707  | <u>LC485703</u> | <u>LC485842</u> | -               | -               | <u>LC484459</u> |  |
| <i>E. sp.</i> 10                                          | Won et al. HW-8816 (HHU)             | Cambodia     | HW8816  | <u>LC485704</u> | <u>LC485843</u> | -               | -               | <u>LC484460</u> |  |
| <i>E. sp.</i> Myanmar                                     | Murata et al. 040646 (TI)            | Myanmar      | M040646 | <u>LC485705</u> | <u>LC485844</u> | <u>LC485568</u> | -               | -               |  |
| <i>E. hamiltonianum</i> Mart.                             | Prajaksood, A. AP405 (KKU)           | Thailand     | AP405   | <u>LC485706</u> | <u>LC485845</u> | <u>LC485569</u> | -               | -               |  |
| <i>E. hamiltonianum</i> Mart.                             | Gale, S.W. et al. HNL-KFBG 876 (HNL) | Laos         | HNL0876 | <u>LC485707</u> | <u>LC485846</u> | <u>LC485570</u> | -               | <u>LC484461</u> |  |
| <i>E. sp.</i> Laos (cf. <i>E. hamiltonianum</i> Mart.)    | Fischer, G. et al. SG1555 (HNL/TNS)  | Laos         | SG1555  | -               | <u>LC485847</u> | <u>LC485571</u> | -               | -               |  |
| <i>E. sp.</i> Myanmar (cf. <i>E. hamiltonianum</i> Mart.) | Tanaka, N. MY1883 (TNS)              | Myanmar      | NT101   | <u>LC485708</u> | <u>LC485848</u> | <u>LC485572</u> | -               | -               |  |
| <i>E. heleocharioides</i> Satake                          | Tanaka, N. TD3741 (TNS)              | Japan        | TD3741  | <u>LC485709</u> | -               | -               | -               | -               |  |
| <i>E. heleocharioides</i> Satake                          | Tanaka, N. TD3769 (TNS)              | Japan        | TD3769  | <u>LC485710</u> | -               | <u>LC485573</u> | -               | -               |  |

|                                                              |                                                     |                    |         |                 |                 |                 |                 |                 |
|--------------------------------------------------------------|-----------------------------------------------------|--------------------|---------|-----------------|-----------------|-----------------|-----------------|-----------------|
| <i>E. heleocharioides</i> Satake                             | Tanaka, N. TD3961 (TNS)                             | Japan              | TD3961  | <u>LC485711</u> | <u>LC485849</u> | -               | -               | <u>LC484462</u> |
| <i>E. alpestre</i> Hook.f. & Thomson<br>ex Körn. (ID unsure) | KUN:0808382                                         | China:<br>Yunnan   | YI2242  | -               | -               | <u>LC485574</u> | <u>LC484937</u> | -               |
| <i>E. henryanum</i> Ruhland                                  | KUN:0987134                                         | China:<br>Yunnan   | YI2234  | -               | -               | <u>LC485575</u> | <u>LC484938</u> | -               |
| <i>E. humboldtii</i> Kunth                                   | n/a                                                 | South<br>America   | -       | -               | AY123236        | -               | -               | -               |
| <i>E. infirmum</i> Steud.                                    | Souladeth, P. PS372 (FOF)                           | Laos               | PS372   | <u>LC485712</u> | <u>LC485850</u> | <u>LC485576</u> | -               | -               |
| <i>E. phuphanense</i> Praj. & J.Parn.                        | Souladeth, P. PS463 (FOF)                           | Laos               | PS463   | <u>LC485713</u> | <u>LC485851</u> | <u>LC485577</u> | -               | -               |
| <i>E. inyangense</i> Arw.                                    | Goyder, D.J. et al. 3910<br>(K:000334401)           | Tanzania           | TD5140  | -               | <u>LC485852</u> | <u>LC485578</u> | -               | -               |
| <i>E. lanatum</i> H.E.Hess                                   | Goyder, D.J. 8202 (K)                               | Angola             | TD5170  | -               | <u>LC485853</u> | -               | -               | -               |
| <i>E. lanatum</i> H.E.Hess                                   | Goyder, D.J. 8369 (K)                               | Angola             | TD5171  | -               | <u>LC485854</u> | <u>LC485579</u> | -               | -               |
| <i>E. laniceps</i> S.M.Phillips                              | Bidgood, S. et al. 5496<br>(K:000190726)            | Tanzania           | TD5141  | -               | <u>LC485855</u> | <u>LC485580</u> | -               | -               |
| <i>E. laniceps</i> S.M.Phillips                              | Bidgood, S. et al. 4528 (K)                         | Tanzania           | TD5142  | -               | <u>LC485856</u> | -               | -               | -               |
| <i>E. lanigerum</i> Lecomte                                  | Souladeth, P. PS450 (FOF)                           | Laos               | PS450   | <u>LC485714</u> | <u>LC485857</u> | <u>LC485581</u> | -               | -               |
| <i>E. lanigerum</i> Lecomte                                  | Gale, S.W. et al. HNL-<br>KFBG 877 (HNL)            | Laos               | HNL0877 | <u>LC485715</u> | <u>LC485858</u> | <u>LC485582</u> | -               | <u>LC484463</u> |
| <i>E. sp. 04</i>                                             | Cho et al. CB-0581 (HHU)                            | Cambodia           | CB0581  | -               | <u>LC485859</u> | <u>LC485583</u> | -               | -               |
| <i>E. laosense</i> Moldenke                                  | Cho et al. CB-0663 (HHU)                            | Cambodia           | CB0663  | <u>LC485716</u> | <u>LC485860</u> | -               | -               | <u>LC484464</u> |
| <i>E. latifolium</i> Sm.                                     | James, M.S. 113<br>(K:000024050)                    | Sierra<br>Leone    | TD5074  | <u>LC485717</u> | <u>LC485861</u> | <u>LC485584</u> | -               | -               |
| <i>E. latifolium</i> Sm.                                     | van der Burgt, X.M. 1252<br>(K:001061388)           | Guinea-<br>Conakry | TD5076  | <u>LC485718</u> | <u>LC485862</u> | <u>LC485585</u> | -               | <u>LC484465</u> |
| <i>E. latifolium</i> Sm.                                     | Mesterházy, A. MALIB258<br>(BP)                     | Liberia            | TD5449  | <u>LC485719</u> | <u>LC485863</u> | <u>LC485586</u> | -               | -               |
| <i>E. latifolium</i> Sm.                                     | Fofana, F. 2015<br>(K:000749970)                    | Guinea-<br>Conakry | TD5075  | -               | <u>LC485864</u> | -               | -               | -               |
| <i>E. microcephalum</i> Kunth                                | Laegaard, S. 51867 (AAU)                            | Ecuador            | TD5189  | <u>LC485720</u> | <u>LC485865</u> | <u>LC485587</u> | -               | -               |
| <i>E. microcephalum</i> Kunth                                | Balslev, H., Paz, G. &<br>Renner, S. S. 69151 (AAU) | Ecuador            | TD5209  | -               | <u>LC485866</u> | -               | -               | -               |
| <i>E. microcephalum</i> Kunth                                | n/a                                                 | n/a                | -       | -               | L10252          | -               | -               | -               |
| <i>E. sp. Ecuador</i> (cf. <i>E. microcephalum</i> Kunth)    | Laegaard, S. 53137 (AAU)                            | Ecuador            | TD5197  | <u>LC485721</u> | <u>LC485867</u> | -               | -               | -               |

|                                                           |                                       |                     |         |                 |                 |                 |   |                 |
|-----------------------------------------------------------|---------------------------------------|---------------------|---------|-----------------|-----------------|-----------------|---|-----------------|
| <i>E. sp.</i> Ecuador (cf. <i>E. microcephalum</i> Kunth) | Laegaard, S. 54153 (AAU)              | Ecuador             | TD5204  | -               | <u>LC485868</u> | -               | - | -               |
| <i>E. sp.</i> Ecuador (cf. <i>E. microcephalum</i> Kunth) | Laegaard, S. 54763 (AAU)              | Ecuador             | TD5205  | -               | <u>LC485869</u> | -               | - | -               |
| <i>E. sp.</i> Ecuador (cf. <i>E. microcephalum</i> Kunth) | Laegaard, S. 54883 (AAU)              | Ecuador             | TD5206  | -               | <u>LC485870</u> | -               | - | -               |
| <i>E. sp.</i> Ecuador (cf. <i>E. microcephalum</i> Kunth) | Laegaard, S. 19384 (AAU)              | Ecuador             | TD5216  | <u>LC485722</u> | <u>LC485871</u> | -               | - | -               |
| <i>E. sp.</i> Ecuador (cf. <i>E. microcephalum</i> Kunth) | Jane, E. Madsen & C. Chmbo 8506 (AAU) | Ecuador             | TD5234  | -               | <u>LC485872</u> | -               | - | -               |
| <i>E. nantoense</i> Hayata                                | Fischer, G. FS7555 (KFBG)             | China:<br>Hong Kong | FS7555  | <u>LC485723</u> | <u>LC485873</u> | <u>LC485588</u> | - | <u>LC484466</u> |
| cf. <i>E. nantoense</i> Hayata                            | Gale, S.W. et al. HNL-KFBG 938 (HNL)  | Laos                | HNL0938 | <u>LC485724</u> | <u>LC485874</u> | <u>LC485589</u> | - | <u>LC484467</u> |
| <i>E. nautiliformoides</i> Praj. & J.Parn.                | Prajaksood, A. AP361 (KKU)            | Thailand            | AP361   | -               | <u>LC485875</u> | <u>LC485590</u> | - | -               |
| <i>E. nautiliformoides</i> Praj. & J.Parn.                | Prajaksood, A. AP366 (KKU)            | Thailand            | AP366   | <u>LC485725</u> | <u>LC485876</u> | <u>LC485591</u> | - | <u>LC484468</u> |
| <i>E. nautiliformoides</i> Praj. & J.Parn.                | Prajaksood, A. AP370 (KKU)            | Thailand            | AP370   | <u>LC485726</u> | <u>LC485877</u> | <u>LC485592</u> | - | -               |
| <i>E. nautiliformoides</i> Praj. & J.Parn.                | Prajaksood, A. AP372 (KKU)            | Thailand            | AP372   | <u>LC485727</u> | <u>LC485878</u> | <u>LC485593</u> | - | -               |
| <i>E. sp.</i> Thai                                        | Prajaksood, A. AP387 (KKU)            | Thailand            | AP387   | <u>LC485728</u> | <u>LC485879</u> | -               | - | -               |
| <i>E. nepalense</i> J.D.Prescott ex Bong. (ID unsure)     | Souladeth, P. PS353 (FOF)             | Laos                | PS353   | <u>LC485729</u> | <u>LC485880</u> | <u>LC485594</u> | - | <u>LC484469</u> |
| <i>E. truncatum</i> (ID unsure)                           | Cho et al. CB-2757 (HHU)              | Cambodia            | CB2757  | -               | <u>LC485881</u> | <u>LC485595</u> | - | -               |
| <i>E. nepalense</i> J.D.Prescott ex Bong.                 | Naito s.n. (TNS:748336)               | Japan               | TD5014  | -               | <u>LC485921</u> | -               | - | -               |
| <i>E. nepalense</i> J.D.Prescott ex Bong.                 | Koga, Y. et al. 14885 (TNS:729621)    | Japan               | TD5015  | -               | <u>LC485882</u> | -               | - | -               |
| <i>E. setaceum</i> L.                                     | Prajaksood, A. AP419 (KKU)            | Thailand            | AP419   | <u>LC485730</u> | <u>LC485883</u> | -               | - | -               |
| <i>E. odoratum</i> Dalzell                                | Prajaksood, A. AP440 (KKU)            | Thailand            | AP440   | -               | <u>LC485884</u> | -               | - | -               |
| <i>E. odoratum</i> Dalzell                                | Prajaksood, A. AP441 (KKU)            | Thailand            | AP441   | <u>LC485731</u> | <u>LC485885</u> | <u>LC485596</u> | - | <u>LC484470</u> |

|                                                                      |                                      |                |         |                 |                 |                 |                 |                 |
|----------------------------------------------------------------------|--------------------------------------|----------------|---------|-----------------|-----------------|-----------------|-----------------|-----------------|
| <i>E. odoratum</i> Dalzell                                           | Prajaksood, A. AP445 (KKU)           | Thailand       | AP445   | <u>LC485732</u> | <u>LC485886</u> | -               | -               | -               |
| <i>E. odoratum</i> Dalzell                                           | Prajaksood, A. AP446 (KKU)           | Thailand       | AP446   | <u>LC485733</u> | <u>LC485887</u> | <u>LC485597</u> | -               | -               |
| <i>E. odoratum</i> Dalzell                                           | Prajaksood, A. AP452 (KKU)           | Thailand       | AP452   | -               | <u>LC485888</u> | -               | -               | -               |
| <i>E. parnellii</i> Praj. & Chantar.                                 | Prajaksood, A. AP415 (KKU)           | Thailand       | AP415   | <u>LC485734</u> | <u>LC485889</u> | -               | -               | -               |
| <i>E. nepalense</i> var. <i>luzulifolium</i> (Mart.) Praj. & J.Parn. | Prajaksood, A. AP451 (KKU)           | Thailand       | AP451   | -               | <u>LC485890</u> | -               | -               | -               |
| <i>E. parvum</i> Körn.                                               | Tanaka, N. TD1324 (TNS)              | Japan          | TD1324  | <u>LC485735</u> | <u>LC485891</u> | -               | -               | -               |
| <i>E. nepalense</i> J.D.Prescott ex Bong.                            | Murata et al. 040640 (TI)            | Myanmar        | M040640 | -               | <u>LC485892</u> | -               | -               | -               |
| <i>E. petraeum</i> S.M.Phillips & Burgt                              | Lopez Poveda, L. LLP299 (K)          | Sierra Leone   | LLP299  | <u>LC485736</u> | <u>LC485893</u> | <u>LC485598</u> | <u>LC484939</u> | <u>LC484471</u> |
| <i>E. petraeum</i> S.M.Phillips & Burgt                              | Lopez Poveda, L. LLP300 (K)          | Sierra Leone   | LLP300  | <u>LC485737</u> | <u>LC485894</u> | <u>LC485599</u> | -               | <u>LC484472</u> |
| <i>E. sulanum</i> S.M.Phillips & Burgt                               | Kanu, K.M.T. 109 (K:000023837)       | Sierra Leone   | TD5101  | <u>LC485738</u> | <u>LC485895</u> | -               | -               | -               |
| <i>E. nautiliforme</i> Lecomte                                       | Prajaksood, A. AP403 (KKU)           | Thailand       | AP403   | <u>LC485739</u> | <u>LC485896</u> | -               | -               | -               |
| <i>E. phuphanoides</i> Praj. & J.Parn.                               | Gale, S.W. et al. HNL-KFBG 936 (HNL) | Laos           | HNL0936 | <u>LC485740</u> | <u>LC485897</u> | <u>LC485600</u> | <u>LC484940</u> | <u>LC484473</u> |
| <i>E. siamense</i> var. <i>hexagynum</i> Praj. & Chantar.            | Prajaksood, A. AP436 (KKU)           | Thailand       | AP436   | <u>LC485741</u> | <u>LC485898</u> | <u>LC485601</u> | -               | -               |
| <i>E. plumale</i> N.E.Br.                                            | Mesterhàzy, A. MAIVO251 (BP)         | Ivory Coast    | TD5460  | <u>LC485742</u> | <u>LC485899</u> | <u>LC485602</u> | <u>LC484941</u> | -               |
| <i>E. plumale</i> N.E.Br.                                            | Pearce, L.J. 39 (K:000580619)        | Guinea-Conakry | TD5083  | <u>LC485743</u> | <u>LC485900</u> | <u>LC485603</u> | <u>LC484942</u> | <u>LC484474</u> |
| cf. <i>E. deightonii</i> Meikle (= <i>E.</i> sp. Sierra Leone)       | Mesterhàzy, A. MASIE256 (BP)         | Sierra Leone   | TD5455  | -               | <u>LC485901</u> | -               | -               | -               |
| <i>E. nadjae</i> S.M.Phillips                                        | Mesterhàzy, A. MALIB199 (BP)         | Liberia        | TD5438  | <u>LC485744</u> | <u>LC485902</u> | -               | -               | -               |
| <i>E. plumale</i> N.E.Br.                                            | Mesterhàzy, A. MAGUI214 (BP)         | Guinea Conakry | TD5452  | <u>LC485745</u> | <u>LC485903</u> | <u>LC485604</u> | <u>LC484943</u> | -               |
| <i>E. plumale</i> N.E.Br.                                            | Mesterhàzy, A. MAGUI212 (BP)         | Guinea Conakry | TD5453  | -               | <u>LC485904</u> | -               | -               | -               |

|                                                                   |                                       |                    |        |                 |                 |                 |                 |                 |
|-------------------------------------------------------------------|---------------------------------------|--------------------|--------|-----------------|-----------------|-----------------|-----------------|-----------------|
| <i>E. plumale</i> subsp. <i>jaegeri</i><br>(Moldenke) Meikle      | Dörrstock, S. 186 (K)                 | Ivory Coast        | TD5080 | <u>LC485746</u> | <u>LC485905</u> | <u>LC485605</u> | <u>LC484944</u> | -               |
| <i>E. plumale</i> subsp. <i>kindiae</i><br>(Lecomte) Meikle       | Cheek, M. 16074<br>(K:000749438)      | Guinea-<br>Conakry | TD5082 | <u>LC485747</u> | <u>LC485906</u> | -               | <u>LC484945</u> | -               |
| <i>E. plumale</i> N.E.Br.                                         | Mesterházy, A. MAGUI194<br>(BP)       | Guinea<br>Conakry  | TD5451 | <u>LC485748</u> | <u>LC485907</u> | <u>LC485606</u> | <u>LC484946</u> | -               |
| <i>E. cryptocephalum</i><br>S.M.Phillips & Mesterházy             | Couch, C.A. 779 (K)                   | Guinea-<br>Conakry | TD5098 | <u>LC485749</u> | <u>LC485908</u> | -               | -               | -               |
| <i>E. pulchellum</i> Körn.                                        | Merklinger, F.F. 167<br>(K:000749332) | Guinea-<br>Conakry | TD5084 | <u>LC485750</u> | <u>LC485909</u> | <u>LC485607</u> | -               | <u>LC484475</u> |
| <i>E. pulchellum</i> Körn.                                        | Haba, P.M. 199<br>(K:000580618)       | Guinea-<br>Conakry | TD5085 | <u>LC485751</u> | <u>LC485910</u> | <u>LC485608</u> | -               | -               |
| <i>E. remotum</i> Lecomte                                         | Molmou, D. 561<br>(K:000749385)       | Guinea-<br>Conakry | TD5087 | -               | <u>LC485911</u> | -               | -               | -               |
| <i>E. rufum</i> Lecomte                                           | Mesterházy, A. MAGUI213<br>(BP)       | Guinea<br>Conakry  | TD5448 | -               | <u>LC485912</u> | -               | -               | -               |
| <i>E. rufum</i> Lecomte                                           | Cheek, M. 18269 (K)                   | Guinea-<br>Conakry | TD5088 | -               | <u>LC485913</u> | <u>LC485658</u> | -               | -               |
| <i>E. scariosum</i> Sm.                                           | Ito, Y. YI2310 (TNS)                  | Australia          | YI2310 | <u>LC485752</u> | <u>LC485914</u> | <u>LC485609</u> | -               | <u>LC484476</u> |
| <i>E. scariosum</i> Sm.                                           | Ito, Y. YI2341 (TNS)                  | Australia          | YI2341 | <u>LC485753</u> | <u>LC485915</u> | <u>LC485610</u> | -               | <u>LC484477</u> |
| <i>E. scariosum</i> Sm.                                           | Ito, Y. YI2343 (TNS)                  | Australia          | YI2343 | -               | <u>LC485916</u> | -               | -               | -               |
| <i>E. scariosum</i> Sm.                                           | Ito, Y. YI2345 (TNS)                  | Australia          | YI2345 | <u>LC485754</u> | <u>LC485917</u> | -               | -               | -               |
| <i>E. schimperi</i>                                               | Faden et al. 96-440<br>(K:3065)       | Tanzania           | K3065  | <u>LC485755</u> | KC123361        | <u>LC485611</u> | <u>LC484947</u> | KP083147        |
| <i>E. buergerianum</i> Körn.                                      | KUN:0774981                           | China:<br>Yunnan   | YI2237 | <u>LC485756</u> | <u>LC485918</u> | -               | -               | -               |
| <i>E. cinereum</i> R.Br.                                          | Ito, Y. YI2346 (TNS)                  | Japan:<br>Wakayama | YI2346 | <u>LC485757</u> | <u>LC485919</u> | <u>LC485612</u> | <u>LC484948</u> | <u>LC484478</u> |
| <i>E. cristatum</i> Mart.                                         | KUN:0771166                           | China:<br>Yunnan   | YI2236 | <u>LC485758</u> | <u>LC485920</u> | <u>LC485613</u> | -               | -               |
| <i>E. schochianum</i> Hand.-Mazz.                                 | Tagane, S. V5362<br>(DLU/TNS)         | Viet Nam           | TD5050 | <u>LC485759</u> | <u>LC485922</u> | <u>LC485614</u> | -               | <u>LC484479</u> |
| <i>E. septangulare</i> With. (= <i>E. aquaticum</i> (Hill) Druce) | n/a                                   | n/a                |        | AY952430        | -               | -               | -               | -               |
| <i>E. sessile</i> Meikle                                          | Mesterházy, A. MAGUI204<br>(BP)       | Guinea<br>Conakry  | TD5454 | -               | <u>LC485923</u> | -               | -               | -               |

|                                                        |                                         |                  |         |                 |                 |                 |                 |                 |
|--------------------------------------------------------|-----------------------------------------|------------------|---------|-----------------|-----------------|-----------------|-----------------|-----------------|
| <i>E. setaceum</i> L.                                  | Faden et al. 96-515 (K:3066)            | n/a              |         | KP083049        | -               | -               | -               | -               |
| <i>E. setaceum</i> L.                                  | Gale, S.W. et al. HNL-KFBG 933 (HNL)    | Laos             | HNL0933 | <u>LC485760</u> | <u>LC485924</u> | <u>LC485615</u> | -               | -               |
| <i>E. setaceum</i> L.                                  | Cheek, M. 18198 (K)                     | Guinea-Conakry   | TD5089  | -               | <u>LC485925</u> | <u>LC485616</u> | -               | -               |
| <i>E. sexangulare</i> L.                               | Gale S.W. SG1372 (KFBG)                 | China: Hong Kong | SG1372  | <u>LC485762</u> | <u>LC485927</u> | <u>LC485618</u> | <u>LC484950</u> | <u>LC484481</u> |
| <i>E. sexangulare</i> L.                               | Gale, S.W. SG1375 (KFBG)                | China: Hong Kong | SG1375  | <u>LC485763</u> | <u>LC485928</u> | -               | -               | <u>LC484482</u> |
| <i>E. sexangulare</i> L.                               | Ito, Y. YI2271 (TNS)                    | Japan: Okinawa   | YI2271  | <u>LC485764</u> | <u>LC485929</u> | <u>LC485619</u> | <u>LC484951</u> | <u>LC484483</u> |
| <i>E. sexangulare</i> L.                               | Ito, Y. YI2283 (TNS)                    | Japan: Okinawa   | YI2283  | <u>LC485765</u> | <u>LC485930</u> | <u>LC485620</u> | <u>LC484952</u> | <u>LC484484</u> |
| <i>E. sp. Australia</i> (cf. <i>E. sexangulare</i> L.) | YSL4415 (TNS)                           | Australia        | TD5433  | <u>LC485766</u> | <u>LC485931</u> | <u>LC485621</u> | <u>LC484953</u> | <u>LC484485</u> |
| <i>E. sp. Macau</i> (cf. <i>E. sexangulare</i> L.)     | Liang, Y.-S. s.n. CED325 (TNS)          | Macau            | CED325  | <u>LC485767</u> | <u>LC485932</u> | <u>LC485622</u> | <u>LC484954</u> | <u>LC484486</u> |
| <i>E. siamense</i> Moldenke                            | Prajaksood, A. AP420 (KKU)              | Thailand         | AP420   | <u>LC485768</u> | <u>LC485933</u> | <u>LC485623</u> | -               | -               |
| <i>E. siamense</i> Moldenke                            | Prajaksood, A. AP429 (KKU)              | Thailand         | AP429   | -               | <u>LC485934</u> | -               | -               | -               |
| <i>E. siamense</i> Moldenke                            | Prajaksood, A. AP425 (KKU)              | Thailand         | AP425   | <u>LC485769</u> | <u>LC485935</u> | -               | -               | -               |
| <i>E. abyssinicum</i> Hochst.                          | Faden, R.B. et al. 96/125 (K)           | Tanzania         | TD5122  | <u>LC485770</u> | <u>LC485936</u> | <u>LC485624</u> | -               | -               |
| <i>E. abyssinicum</i> Hochst.                          | Smook, L 5070 (PRE)                     | South Africa     | TD5296  | <u>LC485771</u> | <u>LC485937</u> | <u>LC485625</u> | -               | -               |
| <i>E. cinereum</i> L.                                  | Giess, W 10245 (PRE)                    | Namibia          | TD5298  | <u>LC485772</u> | <u>LC485938</u> | <u>LC485626</u> | -               | -               |
| <i>E. mutatum</i> N.E.Br.                              | Vlok, OH 1149 (PRE)                     | Namibia          | TD5306  | -               | <u>LC485939</u> | -               | -               | -               |
| <i>E. welwitschii</i> Rendle                           | Faden, R.B. et al. 96/497 (K)           | Tanzania         | TD5130  | <u>LC485773</u> | <u>LC485940</u> | <u>LC485627</u> | -               | -               |
| <i>E. welwitschii</i> Rendle                           | Bidgood, S. et al. 5628 (K:000468796)   | Tanzania         | TD5131  | <u>LC485774</u> | <u>LC485941</u> | -               | -               | -               |
| <i>E. burtii</i> S.M.Phillips                          | Bidgood, S. et al. 7209 (K)             | Tanzania         | TD5134  | -               | <u>LC486037</u> | <u>LC485628</u> | -               | <u>LC484487</u> |
| <i>E. crassiusculum</i> Lye                            | Drummond, R.B. & Hemsley, J.H. 4693 (K) | Uganda           | TD5136  | -               | <u>LC486038</u> | -               | -               | -               |

|                                                                                            |                                      |                |         |                 |                 |                 |                 |                 |
|--------------------------------------------------------------------------------------------|--------------------------------------|----------------|---------|-----------------|-----------------|-----------------|-----------------|-----------------|
| <i>E. deightonii</i> Meikle                                                                | Cheek, M. 18258 (K)                  | Guinea-Conakry | TD5093  | <u>LC485775</u> | <u>LC486039</u> | <u>LC485629</u> | -               | -               |
| <i>E. maronderanum</i> S.M.Phillips                                                        | Smith, P.P. 1712 (K)                 | Zambia         | TD5160  | -               | <u>LC486040</u> | <u>LC485630</u> | -               | -               |
| <i>E. mutatum</i> var.<br><i>angustisepalum</i> (H.E.Hess)<br>S.M.Phillips                 | Faden, R.B. et al. 96/127 (K)        | Tanzania       | TD5125  | -               | <u>LC486041</u> | <u>LC485631</u> | -               | -               |
| <i>E. nigericum</i> Meikle                                                                 | Cheek, M. 16751 (K:000749331)        | Guinea-Conakry | TD5079  | <u>LC485776</u> | <u>LC486042</u> | -               | -               | -               |
| <i>E. porembskii</i> S.M.Phillips & Mesterházy                                             | Mesterházy, A. MAIVO238 (BP)         | Ivory Coast    | TD5458  | <u>LC485777</u> | <u>LC486043</u> | <u>LC485632</u> | -               | -               |
| <i>E. transvaalicum</i> subsp.<br><i>dembianense</i> (Chiov.)<br>S.M.Phillips              | Friis, I. et al. 11944 (K)           | Ethiopia       | TD5119  | <u>LC485778</u> | <u>LC486044</u> | <u>LC485633</u> | -               | -               |
| <i>E. transvaalicum</i> subsp.<br><i>hanningtonii</i> (N.E.Br.)<br>S.M.Phillips            | Cheek, M. 16798 (K:000749430)        | Guinea-Conakry | TD5092  | -               | <u>LC486045</u> | -               | -               | -               |
| <i>E. sp.</i> 01                                                                           | Cho et al. CB-2736 (HHU)             | Cambodia       | CB2736  | <u>LC485779</u> | <u>LC486046</u> | -               | -               | -               |
| <i>E. sp.</i> Cambodia                                                                     | Toyama, H. 2518 (TNS)                | Cambodia       | TD4997  | <u>LC485780</u> | <u>LC486047</u> | -               | -               | -               |
| <i>E. sp.</i> Cambodia                                                                     | Fuse, K. 6353 (TNS)                  | Cambodia       | TD5003  | <u>LC485781</u> | <u>LC486048</u> | -               | -               | <u>LC484488</u> |
| <i>E. sp.</i> India                                                                        | Ito, Y. YI1176 (TNS)                 | India          | YI1176  | -               | <u>LC486049</u> | <u>LC485634</u> | -               | -               |
| <i>E. cinereum</i> L.                                                                      | Ito, Y. YI1161 (TNS)                 | India          | YI1161  | -               | <u>LC486050</u> | -               | -               | -               |
| <i>E. sp.</i>                                                                              | Pell et al. 647 (NY)                 | n/a            |         | KF724337        | -               | -               | -               | -               |
| <i>E. sp.</i> Laos                                                                         | Gale, S.W. et al. HNL-KFBG 875 (HNL) | Laos           | HNL0875 | <u>LC485782</u> | <u>LC486051</u> | <u>LC485635</u> | -               | <u>LC484489</u> |
| <i>E. fluviatile</i> Trimen                                                                | Gale, S.W. et al. HNL-KFBG 929 (HNL) | Laos           | HNL0929 | <u>LC485783</u> | <u>LC486052</u> | <u>LC485636</u> | <u>LC484955</u> | -               |
| <i>E. sp.</i> Laos                                                                         | S. Koi et al. LKF-126 (TNS:01140737) | Laos           | TD5044  | <u>LC485784</u> | <u>LC486053</u> | -               | -               | -               |
| <i>E. sp.</i> Myanmar                                                                      | Tanaka et al. 021704 (TI)            | Myanmar        | M021704 | -               | <u>LC486054</u> | <u>LC485637</u> | -               | -               |
| <i>E. sp.</i> Myanmar                                                                      | Murata et al. 041205 (TI)            | Myanmar        | M041205 | -               | -               | <u>LC485638</u> | <u>LC484956</u> | -               |
| <i>E. sp.</i> Thai (cf. <i>E. ubonense</i> f. <i>kradungense</i> (Satake) Praj. & J.Parn.) | Naiki, A. T4557 (TNS)                | Thailand       | TD5005  | <u>LC485785</u> | <u>LC486055</u> | <u>LC485639</u> | -               | <u>LC484490</u> |
| <i>E. ubonense</i> f. <i>kradungense</i> (Satake) Praj. & J.Parn.                          | Prajaksood, A. AP410 (KKU)           | Thailand       | AP410   | <u>LC485786</u> | <u>LC486056</u> | <u>LC485640</u> | -               | -               |



|                                                                     |                                               |                     |        |                 |                 |                 |                 |                 |                 |
|---------------------------------------------------------------------|-----------------------------------------------|---------------------|--------|-----------------|-----------------|-----------------|-----------------|-----------------|-----------------|
| <i>E. alpestre</i> Hook.f. & Thomson<br>ex Körn.                    | Tanaka, N. CED084 (TNS)                       | Japan:<br>Ibaraki   | CED084 | <u>LC485787</u> | <u>LC486057</u> | <u>LC485641</u> | -               | -               | -               |
| <i>E. buergerianum</i> Körn.                                        | TCMK 493 (K)                                  | n/a                 | -      | -               | KC123360        | -               | -               | -               | -               |
| <i>E. hondoense</i> Satake (= <i>E. taquetii</i> Lecomte)           | Tsugaru, S. & Sawada, T. 35678 (TNS:01156461) | Japan               | TD5045 | <u>LC485788</u> | <u>LC486058</u> | -               | -               | -               | -               |
| <i>E. miquelianum</i> Körn.                                         | Hosokawa, K. H-6 (TNS:01137036)               | Japan               | TD5047 | -               | <u>LC486059</u> | -               | -               | -               | -               |
| <i>E. miquelianum</i> Körn.                                         | Ito, Y. YI2347 (TNS)                          | Japan               | YI2347 | <u>LC485789</u> | <u>LC486060</u> | <u>LC485642</u> | -               | -               | <u>LC484491</u> |
| <i>E. sikokianum</i> Maxim. (= <i>E. miquelianum</i> Körn.)         | Enju, C. CED077 (TNS)                         | Japan:<br>Aichi     | CED077 | <u>LC485790</u> | <u>LC486061</u> | -               | -               | -               | -               |
| <i>E. taquetii</i> Lecomte                                          | Yashiro et al. (TNS:721999)                   | Japan               | TD5016 | -               | <u>LC486062</u> | -               | -               | -               | -               |
| <i>E. taquetii</i> Lecomte                                          | Tanaka, N. TD4891 (TNS)                       | Japan               | TD4891 | <u>LC485791</u> | <u>LC486063</u> | <u>LC485643</u> | <u>LC484957</u> | <u>LC484492</u> | <u>LC484492</u> |
| <i>E. teucszii</i> Lecomte                                          | Goyder, D.J. 8364 (K)                         | Angola              | TD5172 | <u>LC485792</u> | <u>LC486064</u> | -               | -               | -               | -               |
| <i>E. thailandicum</i> Moldenke                                     | Prajaksood, A. AP386 (KKU)                    | Thailand            | AP386  | -               | <u>LC486065</u> | -               | -               | -               | -               |
| <i>E. thailandicum</i> Moldenke                                     | Prajaksood, A. AP353 (KKU)                    | Thailand            | AP353  | -               | <u>LC486066</u> | -               | -               | -               | -               |
| <i>E. thailandicum</i> Moldenke                                     | Souladeth, P. PS364 (FOF)                     | Laos                | PS364  | -               | <u>LC486067</u> | -               | -               | -               | -               |
| <i>E. thailandicum</i> Moldenke                                     | Souladeth, P. PS452 (FOF)                     | Laos                | PS452  | <u>LC485793</u> | <u>LC486068</u> | <u>LC485644</u> | -               | -               | -               |
| <i>E. tingilomum</i> S.M.Phillips & Mesterházy                      | Mesterházy, A. MASIE300 (BP)                  | Sierra Leone        | TD5456 | -               | <u>LC486069</u> | -               | -               | -               | -               |
| <i>E. tingilomum</i> S.M.Phillips & Mesterházy                      | Mesterházy, A. MAIVO143 (BP)                  | Ivory Coast         | TD5459 | <u>LC485794</u> | <u>LC486070</u> | <u>LC485645</u> | <u>LC484958</u> | -               | -               |
| <i>E. tonkinense</i> Ruhland (= <i>E. fluviale</i> Trimen)          | Gale, S.W. SG1371 (KFBG)                      | China:<br>Hong Kong | SG1371 | <u>LC485795</u> | <u>LC486071</u> | <u>LC485646</u> | <u>LC484959</u> | <u>LC484493</u> | <u>LC484493</u> |
| <i>E. tonkinense</i> Ruhland (= <i>E. fluviale</i> Trimen)          | Gale, S.W. SG1374 (KFBG)                      | China:<br>Hong Kong | SG1374 | <u>LC485796</u> | <u>LC486072</u> | <u>LC485647</u> | -               | -               | <u>LC484494</u> |
| <i>E. sp.</i> Myanmar (cf. <i>E. truncatum</i> Buch.-Ham. ex Mart.) | Tanaka, N. NT84 (TNS)                         | Myanmar             | NT84   | <u>LC485797</u> | <u>LC486073</u> | <u>LC485648</u> | -               | -               | <u>LC484495</u> |
| <i>E. truncatum</i> Buch.-Ham. ex Mart.                             | Prajaksood, A. AP454 (KKU)                    | Thailand            | AP454  | <u>LC485798</u> | <u>LC486074</u> | -               | -               | -               | -               |
| <i>E. truncatum</i> Buch.-Ham. ex Mart.                             | Mbago, F.M. et al. 1872 (K)                   | Tanzania            | TD5152 | <u>LC485799</u> | <u>LC486075</u> | <u>LC485649</u> | -               | -               | -               |
| <i>E. truncatum</i> Buch.-Ham. ex Mart.                             | Gale, S.W. SG1373                             | China:              | SG1373 | <u>LC485800</u> | <u>LC486076</u> | -               | -               | -               | -               |

|                                         |                                      |                |         |                 |                 |                 |   |                 |
|-----------------------------------------|--------------------------------------|----------------|---------|-----------------|-----------------|-----------------|---|-----------------|
| Mart.                                   | (KFBG)                               | Hong Kong      |         |                 |                 |                 |   |                 |
| <i>E. truncatum</i> Buch.-Ham. ex Mart. | Ito, Y. YI2264 (TNS)                 | Japan: Okinawa | YI2264  | <u>LC485801</u> | <u>LC486077</u> | <u>LC485650</u> | - | <u>LC484496</u> |
| <i>E. truncatum</i> Buch.-Ham. ex Mart. | Ito, Y. YI2300 (TNS)                 | Malaysia       | YI2300  | <u>LC485802</u> | <u>LC486078</u> | <u>LC485651</u> | - | <u>LC484497</u> |
| <i>E. sp.</i> Cambodia                  | Fuse, S. 6360 (TNS)                  | Cambodia       | TD5004  | <u>LC485803</u> | <u>LC486079</u> | -               | - | -               |
| <i>E. sp.</i> Cambodia                  | Yahara, T. 4565 (TNS)                | Cambodia       | TD4999  | <u>LC485804</u> | <u>LC486080</u> | <u>LC485652</u> | - | <u>LC484498</u> |
| <i>E. sp.</i> Laos                      | Gale, S.W. SG1458 (HNL/TNS)          | Laos           | SG1458  | <u>LC485805</u> | <u>LC486081</u> | <u>LC485653</u> | - | <u>LC484499</u> |
| <i>E. ubonense</i> Lecomte              | Cho et al. CB-1729 (HHU)             | Cambodia       | CB1729  | <u>LC485806</u> | <u>LC486082</u> | <u>LC485654</u> | - | <u>LC484500</u> |
| <i>E. ubonense</i> Lecomte              | Cho et al. CB-2735 (HHU)             | Cambodia       | CB2735  | -               | <u>LC486083</u> | <u>LC485655</u> | - | -               |
| <i>E. varium</i> Kimp.                  | Bidgood, S. et al. 4556 (K)          | Tanzania       | TD5153  | <u>LC485807</u> | <u>LC486084</u> | -               | - | -               |
| <i>E. xeranthemum</i> Mart.             | Prajaksood, A. AP382 (KKU)           | Thailand       | AP382   | <u>LC485808</u> | <u>LC486085</u> | <u>LC485656</u> | - | -               |
| <i>E. zollingerianum</i> Körn.          | Gale, S.W. et al. HNL-KFBG 878 (HNL) | Laos           | HNL0878 | <u>LC485809</u> | <u>LC486086</u> | <u>LC485657</u> | - | -               |
